# Supplementary material
Source: PubMed Central journal article supplement (PMC3129791)
Supplement: mt201122x1.pdf [file mt201122x1.pdf]

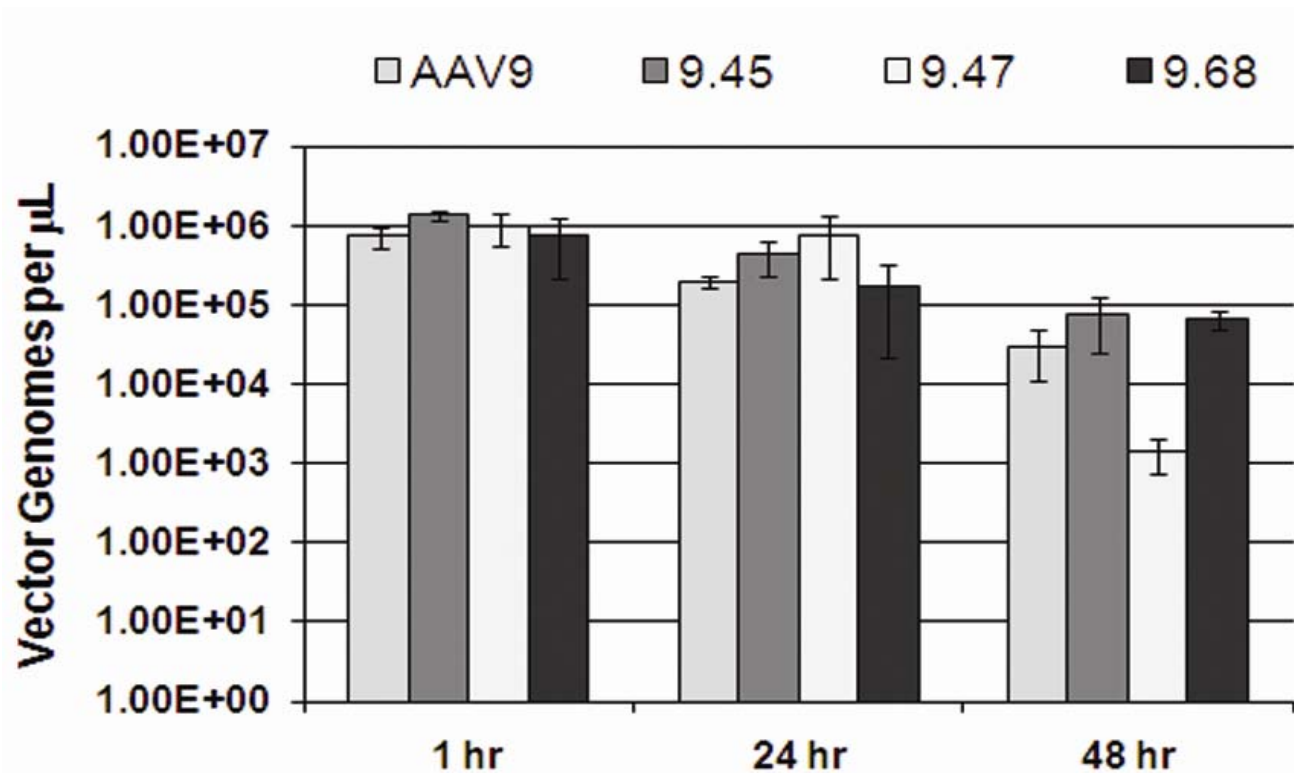

**Figure S1.** Blood circulation profiles of AAV9 and representative variants from each functional subtype; AAV9.47 (I), AAV9.45 (II) and AAV9.68 (III). Vector genome copy numbers in blood were determined at different time intervals following intravenous administration of  $1 \times 10^{10}$  particles of AAV9 and related variants packaging the CBA-luc cassette. At 1, 24 and 48hrs post-injection, 10 $\mu$ l of whole blood was collected from the tail vein in heparinized capillary tubes and viral DNA quantified by qPCR. Vector genome copy numbers are normalized per mL of whole blood. All experiments were carried out in triplicate. Error bars represent standard deviation.
