# Supplementary material
Source: PubMed Central journal article supplement (PMC3129791)
Supplement: mt201122x2.pdf [file mt201122x2.pdf]

**TABLE S1.** List of variants\*

|      |                |                |                |                |                |                |  |
|------|----------------|----------------|----------------|----------------|----------------|----------------|--|
| 9.1  | G1594C - D532H |                |                |                |                |                |  |
| 9.2  | T1418A - V473D | T1436 - I479K  |                |                |                |                |  |
| 9.3  | T1238A - F413Y |                |                |                |                |                |  |
| 9.4  | T1250C - F417S | A1617T - NC    |                |                |                |                |  |
| 9.5  | A1235G - Q412R | A1314T - NC    | A1642G - T548A | C1760T - A587V |                |                |  |
| 9.6  | T1231A - F411I |                |                |                |                |                |  |
| 9.9  | G1203A - NC    | G1785T - W595C |                |                |                |                |  |
| 9.10 | A1500G - NC    | T1676C - M559T |                |                |                |                |  |
| 9.11 | A1425T - NC    | A1702C - T568P | A1769T - Q590L |                |                |                |  |
| 9.13 | A1369C - N457H | A1720T - T574S |                |                |                |                |  |
| 9.14 | T1340A - L447H | T1362C - NC    | T1560C - NC    | G1713A - NC    |                |                |  |
| 9.16 | A1775T - Q592L |                |                |                |                |                |  |
| 9.24 | T1507C - W503R | T1521G - NC    |                |                |                |                |  |
| 9.26 | A1337G - Y446C | A1769C - Q590P |                |                |                |                |  |
| 9.33 | A1667C - D556A |                |                |                |                |                |  |
| 9.34 | A1534G - N512D | C1794T - NC    |                |                |                |                |  |
| 9.35 | A1289T - Q430L | T1450A - Y484N | C1494T - NC    | A1515T - NC    | C1794A - N598K | G1816A - V606I |  |
| 9.40 | A1694T - E565V |                |                |                |                |                |  |
| 9.41 | A1348T - T450S | T1362C - NC    |                |                |                |                |  |
| 9.44 | A1684C - N562H | A1701T - K567N | A1737G - NC    |                |                |                |  |
| 9.45 | A1492T - N498Y | C1804T - L602F |                |                |                |                |  |
| 9.46 | G1441C - G481R | T1525C - W509R | T1549G - L517V |                |                |                |  |

Table continued in next page

**TABLE S1** (continued). List of variants\*

|      |                |                |                |                |                |                |                |
|------|----------------|----------------|----------------|----------------|----------------|----------------|----------------|
| 9.47 | G1241A - S414N | G1358A - G453D | A1669G - K557E | C1745T - T582I |                |                |                |
| 9.48 | C1445T - P482L | A1736T - Q579L |                |                |                |                |                |
| 9.50 | A1638T - Q546H | C1683T - NC    | T1805A - L602H |                |                |                |                |
| 9.53 | G1301A - R434Q | A1405C - S469R | C1664T - A555V | G1811T - G604V |                |                |                |
| 9.54 | C1531A - L511I | T1609A - L537M |                |                |                |                |                |
| 9.55 | T1605A - F535L |                |                |                |                |                |                |
| 9.58 | C1475T - T492I | C1579A - H527N |                |                |                |                |                |
| 9.59 | T1336C - Y446H |                |                |                |                |                |                |
| 9.61 | A1493T - N498I |                |                |                |                |                |                |
| 9.64 | C1531A - L511I | A1617T - NC    |                |                |                |                |                |
| 9.65 | C1335T - NC    | T1530C - NC    | C1568A - A523D |                |                |                |                |
| 9.68 | C1510A - P504T |                |                |                |                |                |                |
| 9.80 | G1441A - G481R |                |                |                |                |                |                |
| 9.83 | A1314T - NC    | A1694G - E565G | A1751T - H584L |                |                |                |                |
| 9.84 | C1402A - P468T | A1500T - E500D |                |                |                |                |                |
| 9.87 | T1464C - NC    | T1468C - S490P |                |                |                |                |                |
| 9.90 | A1196T - Y399F |                |                |                |                |                |                |
| 9.91 | T1316G - L439R | A1583T - K528I | C1782G - NC    | T1806C - NC    |                |                |                |
| 9.93 | A1273G - S425G | A1421G - Q474R | A1638C - Q546H | C1712T - P571L | G1732A - G578R | A1744T - T582S | A1832T - D611V |
| 9.94 | A1675T - M559L |                |                |                |                |                |                |
| 9.95 | T1605A - F535L |                |                |                |                |                |                |

\* List of point mutations in 43 viable AAV9 variants obtained after screening 95 clones. The remaining clones had stop codons, silent mutations, insertions and deletions leading to frame shift. **NC** - no change of amino acid (silent mutation)
