# Supplementary material
Source: PubMed Central journal article supplement (PMC3129791)
Supplement: mt201122x3.pdf [file mt201122x3.pdf]

**TABLE S2.** Vector genome titers

| <b>Variant</b> | <b>vg/<math>\mu</math>l*</b> |
|----------------|------------------------------|
| <b>AAV9</b>    | <b>3.36E+08</b>              |
| <b>9.9</b>     | <b>9.41E+08</b>              |
| <b>9.11</b>    | <b>7.33E+08</b>              |
| <b>9.13</b>    | <b>6.56E+08</b>              |
| <b>9.16</b>    | <b>6.27E+08</b>              |
| <b>9.24</b>    | <b>3.09E+08</b>              |
| <b>9.45</b>    | <b>2.38E+08</b>              |
| <b>9.47</b>    | <b>3.41E+08</b>              |
| <b>9.61</b>    | <b>3.49E+08</b>              |
| <b>9.68</b>    | <b>2.13E+08</b>              |
| <b>9.84</b>    | <b>5.47E+08</b>              |

\* Titers are average of two sample values
